# Supplementary material
Source: publisher site journal article supplement (https://www.dovepress.com/article/95165)
Supplement: Supplementary file 1 [file get_supplementary_file.php]

# Supplementary information

## Notes on Figure 2

The response curves shown in Figure 1 (in the main article) were examined to determine a suitable form for parameterization of the time function in the statistical model: i.e., the method employed to model the shapes of the curves. It was concluded that each curve could be well approximated by 3 linear pieces: from day 1 to day 28, from day 29 to day 56, and from day 57 to day 84.

On the COAT scale for the knee joint, the differences between treatments on the 3 slope segments were as follows: there was a non-significant greater rate of reduction in placebo than active between day 1 and day 28 (0.0145 difference per day,  $p=0.176$ ); there was a non-significant smaller rate of reduction in placebo than active between day 29 and day 56 (0.00062 difference per day,  $p=0.494$ ); and there was an increase in placebo and a decrease in active between day 57 and day 84 with this difference being non-significant (0.0042 difference per day,  $p=0.397$ ). Mean COAT scale scores for the knee joint reduced from 3.19 at day 1 to 2.21 at day 84 (30.6%) in the placebo group and from 3.03 at day 1 to 2.15 at day 84 (29.0%) in the active group. The overall difference (day 1 to day 84) in response slopes between placebo and active for the knee joint was non-significant with an estimate = 0.00118 per day,  $SE=0.00577$ , and  $p=0.838$ . In addition, there were no significant ( $p<0.05$ ) differences between treatments on COAT scale mean scores for the knee joint at any of day 1, day 28, day 56, or day 84.

On the COAT scale for the hip joint, the differences between treatments on the 3 slope segments (Treatment \* F1, Treatment \* F2, Treatment \* F3) were as follows: there was a non-significantly smaller rate of reduction in placebo than active between day 1 and day 28 (0.0150 difference per day,  $p=0.307$ ); there was a reduction in placebo and an increase in active between day 29 and day 56 with this difference being non-significant (0.0239 difference per day,  $p=0.057$ ); and there was a non-significantly greater rate of increase in placebo than active between day 57 and day 84 (0.0076 difference per day,  $p=0.609$ ). Mean COAT scores for the hip joint reduced from 3.37 at day 1 to 2.49 at day 84 (26.3%) in placebo and from 4.10 at day 1 to 3.26 at day 84 (20.3%) in active. The overall difference (day 1 to day 84) in response slopes between placebo and active for the hip joint was non-significant with an estimate = 0.00062 per day,  $SE=0.00798$  and  $p=0.938$ . In addition, there were no significant ( $p<0.05$ ) differences between treatments on COAT scale mean scores for the hip joint at any of day 1, day 28, day 56, or day 84.

## Statistical data

Table S1 reports the removal sequence of the fixed effects and results of tests of their significance prior to their removal, and tests of the significance of effects retained in the final model. The 3 linear functions of day (F1, F2, and F3) were treated as a set, to be either removed or retained together.

Tables S2-S12 provide the descriptive statistics and outcomes for the other aspects of the study discussed in the results section of the main paper.

**Table S1.** Removal sequence of fixed effects, results of tests of their significance prior to their removal, and tests of significance for effects retained in final model

| Effect                 | Removal sequence | Test of significance at removal |         |       |
|------------------------|------------------|---------------------------------|---------|-------|
|                        |                  | DF <sup>2</sup>                 | F       | P     |
| Intercept <sup>1</sup> | Retained         | 129.705                         | 299.793 | 0.000 |

|                               |          |         |        |       |
|-------------------------------|----------|---------|--------|-------|
| <i>Treatment</i>              | 5        | 92.979  | 0.590  | 0.444 |
| <i>Joint</i>                  | 6        | 93.988  | 2.056  | 0.155 |
| F1                            | Retained | 854.539 | 47.597 | 0.000 |
| F2                            | Retained | 727.676 | 4.180  | 0.041 |
| F3                            | Retained | 854.000 | .802   | 0.371 |
| <i>Treatment * Joint</i>      | 3        | 92.013  | 0.721  | 0.398 |
| <i>Treatment * F1</i>         | 2        | 848.948 | 0.239  | 0.625 |
| <i>Treatment * F2</i>         | 2        | 722.997 | 0.334  | 0.563 |
| <i>Treatment * F3</i>         | 2        | 849.412 | 0.406  | 0.524 |
| <i>Joint * F1</i>             | 4        | 854.667 | 3.047  | 0.081 |
| <i>Joint * F2</i>             | 4        | 727.609 | 2.006  | 0.157 |
| <i>Joint * F3</i>             | 4        | 854.224 | 0.560  | 0.455 |
| <i>Treatment * Joint * F1</i> | 1        | 848.812 | 2.637  | 0.105 |
| <i>Treatment * Joint * F2</i> | 1        | 722.434 | 3.785  | 0.052 |
| <i>Treatment * Joint * F3</i> | 1        | 850.188 | 0.035  | 0.852 |

1. In the final model, the intercept is the mean COAT score at day 1; 2. Denominator degrees of freedom. Numerator degrees of freedom = 1 for all effects.

**Table S2.** Descriptive statistics (mean, median, sd, minima, maxima) for % compliance by treatment and time together with results of t-tests

| Period             | Placebo (n=42) |        |      |     |     | Active(n=54) |        |      |     |     | t-test  |
|--------------------|----------------|--------|------|-----|-----|--------------|--------|------|-----|-----|---------|
|                    | Mean           | Median | SD   | Min | Max | Mean         | Median | SD   | Min | Max | P value |
| Baseline to week 4 | 95.0           | 98.0   | 7.31 | 73  | 100 | 96.3         | 100.0  | 5.18 | 82  | 100 | 0.297   |
| Week 4 to week 8   | 94.0           | 96.0   | 7.03 | 75  | 100 | 94.4         | 96.0   | 7.50 | 63  | 100 | 0.772   |
| Week 8 to week 12  | 91.0           | 93.0   | 8.25 | 73  | 100 | 93.1         | 95.5   | 8.48 | 60  | 100 | 0.210   |

**Table S3.** Estimated means over time for % compliance from repeated measures analysis of variance.

| Period             | Mean   | SE    | 95% CI |      |
|--------------------|--------|-------|--------|------|
| Baseline to week 4 | 95.646 | 0.638 | 94.4   | 96.9 |
| Week 4 to week 8   | 94.171 | 0.750 | 92.7   | 95.7 |
| Week 8 to week 12  | 92.041 | 0.862 | 90.3   | 93.8 |

**Table S4.** Secondary outcomes CRP, IL-6, log(IL), TNF-alpha (means, SD, minima and maxima) by treatment at baseline and completion (week 12).

| Secondar | Occasion |  | Placebo |  |  | Active |  |
|----------|----------|--|---------|--|--|--------|--|
|----------|----------|--|---------|--|--|--------|--|

| y<br>Outcomes |            | N  | Mean | SD    | Min       | Max  | N  | Mean | SD    | Min       | Max  |
|---------------|------------|----|------|-------|-----------|------|----|------|-------|-----------|------|
|               |            |    |      |       |           |      |    |      |       |           |      |
| CRP           | Baseline   | 42 | 0.41 | 0.462 | 0.0       | 2.4  | 54 | 0.49 | 0.673 | 0.0       | 3.3  |
|               | Completion | 42 | 0.30 | 0.358 | 0.0       | 2.0  | 54 | 0.56 | 1.052 | 0.0       | 6.6  |
| IL-6          | Baseline   | 42 | 2.15 | 1.786 | 0.5       | 8.0  | 54 | 1.75 | 1.048 | 0.5       | 4.7  |
|               | Completion | 42 | 1.66 | 1.048 | 0.4       | 4.5  | 54 | 2.06 | 1.533 | 0.4       | 10.5 |
| log(IL-6)     | Baseline   | 42 | 0.22 | 0.30  | -<br>0.29 | 0.91 | 54 | 0.17 | 0.25  | -<br>0.29 | 0.67 |
|               | Completion | 42 | 0.14 | 0.26  | -<br>0.40 | 0.65 | 54 | 0.20 | 0.25  | -<br>0.40 | 1.02 |
| TNF-alpha     | Baseline   | 42 | 1.55 | 0.771 | 0.7       | 5.2  | 54 | 1.54 | 0.797 | 0.4       | 4.8  |
|               | Completion | 42 | 1.67 | 0.936 | 0.6       | 5.2  | 54 | 1.79 | 1.001 | 0.4       | 5.4  |

The results of independent t-tests for the secondary outcome measures showed no difference between treatments ( $p > 0.05$ ) for any of the outcomes at baseline.

**Table S5.** Secondary outcomes: Results of repeated measures ANOVA

|           | p-values for Repeated Measures |                   |           |
|-----------|--------------------------------|-------------------|-----------|
|           | Time                           | Treatment by time | Treatment |
| CRP       | 0.779                          | 0.108             | 0.218     |
| IL-6      | 0.485                          | 0.004             | 0.995     |
| log(IL-6) | 0.794                          | 0.004             | 0.749     |
| TNF alpha | 0.016                          | 0.392             | 0.749     |

**Table S6.** BMI (means, median, SD, minima and maxima) by treatment at baseline, week 4, week 8 and completion (week 12).

|          | Placebo |      |        |     |      |      | Active |      |        |     |      |      |
|----------|---------|------|--------|-----|------|------|--------|------|--------|-----|------|------|
|          | N       | Mean | Median | SD  | Min  | Max  | N      | Mean | Median | SD  | Min  | Max  |
| Baseline | 42      | 28.8 | 28.1   | 5.3 | 19.7 | 48.4 | 54     | 28.7 | 27.8   | 4.6 | 18.3 | 39.3 |
| Week 4   | 40      | 29.3 | 28.6   | 5.1 | 21.2 | 48.4 | 50     | 29.0 | 27.9   | 4.5 | 22.7 | 38.6 |
| Week 8   | 39      | 29.1 | 28.4   | 4.9 | 20.9 | 47.3 | 53     | 28.9 | 28.0   | 4.6 | 18.1 | 39.3 |
| Week 12  | 39      | 29.3 | 29.0   | 5.2 | 19.7 | 47.3 | 53     | 28.7 | 27.9   | 4.5 | 17.9 | 38.6 |

**Table S7.** Estimated means for time and treatment by time effects from multilevel AR1 model for BMI.

|          | Time  |      | Placebo |      | Active |      |
|----------|-------|------|---------|------|--------|------|
|          | Mean  | SE   | Mean    | SE   | Mean   | SE   |
| Baseline | 28.72 | 0.50 | 28.79   | 0.75 | 28.66  | 0.66 |
| Week 4   | 28.95 | 0.50 | 29.09   | 0.75 | 28.81  | 0.66 |

|         |       |      |       |      |       |      |
|---------|-------|------|-------|------|-------|------|
| Week 8  | 28.96 | 0.50 | 29.16 | 0.75 | 28.77 | 0.66 |
| Week 12 | 28.91 | 0.50 | 29.19 | 0.75 | 28.64 | 0.66 |

**Table S8.** Results of post hoc comparisons of baseline compared to week 4, 8, 12 for BMI for the significant time and treatment by time interaction

| Post hoc comparison |         | For time effect |       |         | For Treatment by time interaction |       |         |           |       |         |
|---------------------|---------|-----------------|-------|---------|-----------------------------------|-------|---------|-----------|-------|---------|
|                     |         | Mean diff       | SE    | P value | Placebo                           |       |         | Active    |       |         |
|                     |         |                 |       |         | Mean diff                         | SE    | P value | Mean diff | SE    | P value |
| Baseline vs         | Week 4  | -0.226          | 0.060 | 0.001   | -0.301                            | 0.090 | 0.005   | -0.152    | 0.079 | 0.339   |
|                     | Week 8  | -0.242          | 0.069 | 0.004   | -0.368                            | 0.105 | 0.003   | -0.115    | 0.090 | 1.000   |
|                     | Week 12 | -0.188          | 0.073 | 0.065   | -0.399*                           | 0.110 | 0.002   | 0.024     | 0.094 | 1.000   |

**Table S9.** Blood Safety (means, SD, minima and maxima) by treatment and measurement occasion.

|                              | Placebo |        |       |      |      | Active |        |       |      |      |
|------------------------------|---------|--------|-------|------|------|--------|--------|-------|------|------|
|                              | N       | Mean   | SD    | Min  | Max  | N      | Mean   | SD    | Min  | Max  |
| <b>Haematology Baseline</b>  |         |        |       |      |      |        |        |       |      |      |
| Red Cell Count               | 42      | 4.60   | 0.60  | 4.0  | 6.0  | 54     | 4.49   | 0.51  | 4.0  | 6.0  |
| Haemoglobin                  | 42      | 145.21 | 13.68 | 119  | 176  | 54     | 142.35 | 10.32 | 126  | 167  |
| Haemacrit                    | 42      | 0.05   | 0.15  | 0.00 | 0.52 | 54     | 0.08   | 0.16  | 0.00 | 0.45 |
| Mean Corpuscular Volume      | 42      | 92.10  | 3.75  | 86   | 101  | 54     | 91.67  | 4.08  | 76   | 99   |
| White Cell Count             | 42      | 6.25   | 1.87  | 3.9  | 12.0 | 54     | 5.91   | 1.25  | 3.3  | 10.0 |
| Lymphocytes                  | 42      | 2.03   | 0.75  | 1    | 4    | 54     | 1.92   | 0.55  | 1    | 4    |
| Monocytes                    | 42      | 0.35   | 0.48  | 0.0  | 1.4  | 54     | 0.25   | 0.38  | 0.0  | 1.0  |
| Neutrophils                  | 42      | 3.41   | 1.42  | 1.8  | 7.0  | 54     | 3.27   | 0.93  | 1.6  | 6.0  |
| Basophils                    | 42      | 0.00   | 0.00  | 0.0  | 0.0  | 53     | 0.00   | 0.01  | 0.0  | 0.1  |
| Eosinophils                  | 42      | 0.06   | 0.22  | 0.0  | 1.0  | 54     | 0.07   | 0.21  | .00  | 1.0  |
| Platelets                    | 42      | 225.50 | 53.48 | 108  | 349  | 53     | 232.34 | 44.29 | 127  | 356  |
| <b>Biochemistry Baseline</b> |         |        |       |      |      |        |        |       |      |      |
| Alkaline Phosphatase         | 42      | 74.21  | 28.47 | 20   | 166  | 54     | 71.74  | 16.70 | 46   | 128  |
| Serum Alanine                | 42      | 23.67  | 16.81 | 6    | 91   | 54     | 22.0   | 7.50  | 7    | 47   |

|                                   |    |        |       |     |      |    |        |       |     |     |
|-----------------------------------|----|--------|-------|-----|------|----|--------|-------|-----|-----|
| Aminotransferase                  |    |        |       |     |      |    | 4      |       |     |     |
| Aspartate Aminotransferase        | 36 | 21.78  | 9.06  | 5   | 63   | 44 | 21.16  | 4.20  | 13  | 31  |
| Gamma Glutamyl Transferase        | 42 | 30.33  | 24.84 | 10  | 144  | 54 | 32.20  | 23.81 | 9   | 126 |
| Bilirubin                         | 42 | 13.12  | 5.64  | 6   | 34   | 54 | 10.87  | 5.08  | 1   | 34  |
| Protein                           | 42 | 72.93  | 4.36  | 64  | 81   | 54 | 71.69  | 4.17  | 61  | 86  |
| Albumin                           | 42 | 40.02  | 3.35  | 32  | 46   | 54 | 40.00  | 3.68  | 33  | 50  |
| Sodium                            | 42 | 139.26 | 1.91  | 134 | 143  | 54 | 138.94 | 1.95  | 132 | 142 |
| Potassium                         | 42 | 4.40   | 0.85  | 0   | 5    | 54 | 4.50   | 0.48  | 4   | 5   |
| Chloride                          | 42 | 104.14 | 1.87  | 100 | 108  | 54 | 104.22 | 2.65  | 94  | 110 |
| Bun/Urea                          | 42 | 5.97   | 1.49  | 3   | 9    | 54 | 5.51   | 1.31  | 2   | 9   |
| Creatine                          | 42 | 74.90  | 13.18 | 56  | 109  | 54 | 72.28  | 15.10 | 53  | 117 |
| <b>Haematology at Completion</b>  |    |        |       |     |      |    |        |       |     |     |
| Red Cell Count                    | 42 | 4.38   | 0.49  | 3.9 | 5.0  | 54 | 4.34   | 0.51  | 3.6 | 6.0 |
| Haemoglobin                       | 42 | 140.17 | 11.01 | 118 | 160  | 54 | 138.65 | 9.96  | 110 | 169 |
| Haemacrit                         | 42 | 0.05   | 0.14  | .00 | .47  | 54 | 0.07   | 0.15  | .00 | .41 |
| Mean Corpuscular Volume           | 42 | 91.79  | 3.59  | 86  | 101  | 54 | 91.17  | 4.19  | 75  | 98  |
| White Cell Count                  | 42 | 6.20   | 1.66  | 3.4 | 11.0 | 54 | 6.07   | 1.21  | 3.4 | 9.0 |
| Lymphocytes                       | 42 | 2.15   | 0.58  | 1   | 4    | 54 | 1.95   | 0.58  | 1   | 4   |
| Monocytes                         | 42 | 0.42   | 0.48  | 0.0 | 1.0  | 54 | 0.46   | 0.46  | 0.0 | 1.0 |
| Neutrophils                       | 42 | 3.34   | 1.33  | 1.4 | 8.0  | 54 | 3.29   | 1.00  | 1.8 | 6.6 |
| Basophils                         | 42 | 0.00   | 0.00  | .0  | .0   | 54 | 0.00   | 0.01  | .0  | .1  |
| Eosinophils                       | 42 | 0.06   | 0.22  | 0.0 | 1.0  | 54 | 0.11   | 0.27  | 0.0 | 1.0 |
| Platelets                         | 42 | 217.76 | 48.61 | 142 | 328  | 54 | 223.57 | 45.19 | 74  | 321 |
| <b>Biochemistry at Completion</b> |    |        |       |     |      |    |        |       |     |     |
| Serum Alanine Aminotransferase    | 42 | 21.24  | 10.72 | 8   | 53   | 54 | 22.63  | 7.56  | 6   | 42  |
| Aspartate Aminotransferase        | 37 | 19.97  | 6.76  | 0   | 35   | 43 | 21.58  | 6.90  | 4   | 37  |
| Gamma Glutamyl Transferase        | 42 | 28.90  | 21.34 | 10  | 125  | 54 | 32.35  | 27.12 | 10  | 142 |

|           |    |        |       |     |     |    |        |       |     |     |
|-----------|----|--------|-------|-----|-----|----|--------|-------|-----|-----|
| Bilirubin | 42 | 11.40  | 3.67  | 6   | 21  | 54 | 10.19  | 4.28  | 4   | 29  |
| Protein   | 42 | 71.62  | 3.57  | 65  | 79  | 54 | 70.80  | 3.75  | 59  | 78  |
| Albumin   | 42 | 40.79  | 2.70  | 35  | 47  | 54 | 40.78  | 2.99  | 35  | 49  |
| Sodium    | 42 | 139.31 | 1.84  | 135 | 143 | 54 | 139.63 | 2.33  | 129 | 143 |
| Potassium | 42 | 4.25   | 0.43  | 4   | 5   | 54 | 4.21   | 0.48  | 3   | 6   |
| Chloride  | 42 | 105.52 | 2.32  | 101 | 112 | 54 | 105.63 | 2.66  | 97  | 110 |
| Bun/Urea  | 42 | 5.83   | 1.21  | 4   | 9   | 54 | 5.84   | 1.62  | 3   | 10  |
| Creatine  | 42 | 75.33  | 13.63 | 58  | 112 | 54 | 73.57  | 14.58 | 57  | 124 |

**Table S10.** Results of repeated measurement analysis for hematology and biochemical blood measures

|                                | <b>p values for Repeated Measures</b> |                   |           |
|--------------------------------|---------------------------------------|-------------------|-----------|
|                                | Time                                  | Treatment by time | Treatment |
| <b>Haematology</b>             |                                       |                   |           |
| Red Cell Count                 | 0.000                                 | 0.338             | 0.430     |
| Haemoglobin                    | 0.000                                 | 0.280             | 0.326     |
| Haemacrit                      | 0.001                                 | 0.789             | 0.441     |
| Mean Corpuscular Volume        | 0.001                                 | 0.423             | 0.515     |
| White Cell Count               | 0.626                                 | 0.381             | 0.409     |
| Lymphocytes                    | 0.180                                 | 0.412             | 0.193     |
| Monocytes                      | 0.002                                 | 0.127             | 0.755     |
| Neutrophils                    | 0.787                                 | 0.662             | 0.642     |
| Basophils                      | 1.000                                 | 1.000             | 0.207     |
| Eosinophils                    | 0.408                                 | 0.408             | 0.416     |
| Platelets                      | 0.000                                 | 0.819             | 0.511     |
| <b>Biochemistry</b>            |                                       |                   |           |
| Alkaline Phosphatase           | 0.003                                 | 0.162             | 0.906     |
| Serum Alanine Aminotransferase | 0.349                                 | 0.125             | 0.953     |
| Aspartate Aminotransferase     | 0.641                                 | 0.330             | 0.867     |
| Gamma Glutamyl Transferase     | 0.621                                 | 0.543             | 0.587     |
| Bilirubin                      | 0.004                                 | 0.214             | 0.052     |
| Protein                        | 0.001                                 | 0.510             | 0.174     |
| Albumin                        | 0.000                                 | 0.696             | 0.980     |
| Sodium                         | 0.041                                 | 0.075             | 0.997     |
| Potassium                      | 0.006                                 | 0.382             | 0.697     |
| Chloride                       | 0.000                                 | 0.949             | 0.839     |

|          |       |       |       |
|----------|-------|-------|-------|
| Bun/Urea | 0.489 | 0.075 | 0.387 |
| Creatine | 0.141 | 0.457 | 0.447 |

**Table S11.** Numbers and percentages of adverse events experienced by treatment group between weeks 0-4, 4-8 and 8-12, and over the full 12 weeks

|           | Placebo |         | Active |         | P value |
|-----------|---------|---------|--------|---------|---------|
|           | Number  | Percent | Number | Percent |         |
| Week 0-4  | 3       | 7.3     | 2      | 3.9     | 0.653   |
| Week 4-8  | 1       | 2.4     | 1      | 1.9     | 1.00    |
| Week 8-12 | 1       | 2.4     | 0      | 0.0     | 0.437   |
| Overall   | 5       | 11.9    | 3      | 5.6     | 0.292   |
